# Supplementary material for: Sub-diffraction-limit imaging by stochastic optical reconstruction microscopy (STORM)
Source: Springer Nature journal article supplement (doi:10.1038/nmeth929), 2006-08-09
Supplement: 41592_2006_BFnmeth929_MOESM1_ESM.pdf [file 41592_2006_BFnmeth929_MOESM1_ESM.pdf]

## Supplementary Figure 1: Switching of Cy3-Cy5-labeled antibody

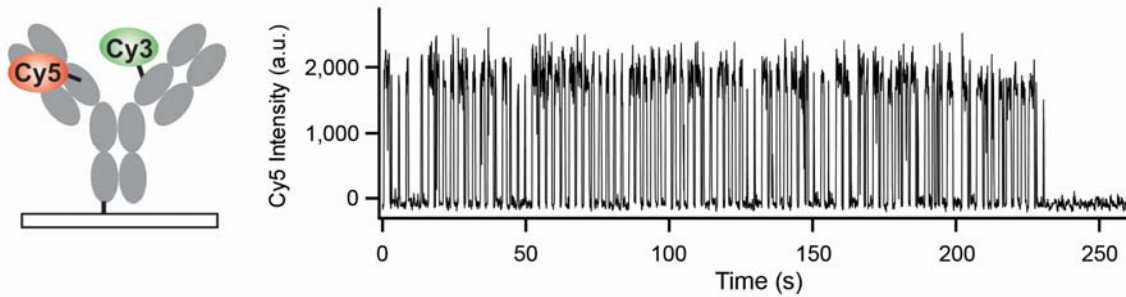

Goat anti-mouse secondary antibody labeled with the cyanine switch exhibits photoswitching behavior similar to switch-labeled DNA. The antibody was labeled with Cy3 and Cy5 (as described in **Supplementary Methods** online) and bound to a quartz slide coated with unlabeled mouse anti-transferrin primary antibody. The trace shows the Cy5 fluorescence intensity detected from a single labeled antibody as it switches on and off until permanent photobleaching occurs after 230 seconds. A red laser ( $633\text{ nm}$ ,  $30\text{ W/cm}^2$ ) is used to excite fluorescence from Cy5 and to switch Cy5 to the dark state. A green laser ( $532\text{ nm}$ ,  $1\text{ W/cm}^2$ ) is used to switch the Cy5 back to the fluorescent state. The sample was excited with a sequence of alternating green and red laser pulses (0.5 s green followed by 2 s red).
